# The limitations of phenotype prediction in metabolism

Pablo Yubero, Alvar A. Lavin, Juan F. Poyatos<sup>1</sup>

<sup>1</sup>Logic of Genomic Systems Lab (CNB-CSIC) Madrid. Email: [jpoyatos@cnb.csic.es](mailto:jpoyatos@cnb.csic.es)

## ABSTRACT

Phenotype prediction is at the core of many questions in biology. Prediction is frequently attained by determining statistical associations between genetic and phenotypic variation, ignoring the exact processes that lead to the phenotype. Here, we present a framework based on genome-scale metabolic reconstructions to reveal the mechanisms behind the associations. We compute a polygenic score (PGS) that identifies a set of enzymes as predictors of growth, the phenotype. This set arises from the synergy of the functional mode of metabolism in a particular environment and its evolutionary history, and is transportable to anticipate the phenotype across a range of environments. We also find that there exists an optimal genetic variability for predictability and demonstrate how the linear PGS can yet explain phenotypes generated by the underlying nonlinear biochemistry. Thus, the explicit model interprets the black-box statistical associations of the genotype-to-phenotype map and uncovers the limits of prediction in metabolism.

## 17 INTRODUCTION

18 By understanding the factors that specify the phenotype, we aim to recognize how herita-  
19 ble biological information eventually maps onto action and how this mapping evolves ([Wadding-](#)  
20 [ton 2015](#)). These issues illustrate the more general question of the emergence of function in  
21 complex systems, and the inherent attributes of these systems that help them elude function  
22 prediction ([Orrell 2007](#)). We will discuss here the properly biological case of metabolism.

23 The variational method of quantitative genetics symbolizes a traditional approach to this  
24 question. Its goal is to establish statistical associations between the genetic and phenotypic  
25 variation observed within a certain population ([Lynch and Walsh 1998](#)). When this *genotype-*  
26 *to-phenotype* (GP) map becomes determined in a supervised situation, it is then possible  
27 to develop tools that anticipate the phenotype of individuals based solely on their genetic  
28 sequence ([Dudbridge 2013](#)). What are the limits of this approach?

29 Valid as they are, the statistical associations of quantitative genetics depend very much  
30 on the features of the trait, the population context, and the environmental conditions under  
31 which they are identified ([Zaidi and Mathieson 2020](#)). They thus represent a kind of "black-  
32 box" expectation that does not provide any insights into the processes leading to a particular  
33 phenotype ([Cannon and Mohlke 2018](#)). This absence of mechanism has both basic and  
34 applied implications.

35 From the fundamental point of view, many features that define the genetic architecture of  
36 phenotypes (dominance, epistasis, etc.), while having a clear variational definition, present a  
37 less clear mechanistic interpretation ([Keightley and Kacser 1987](#); [Omholt et al. 2000](#)). An in-  
38 terpretation that should also help explain how the nonlinearity that seems dominant in many  
39 biological systems does not limit the power of the –linear– statistical procedures ([Feldman](#)  
40 [and Lewontin 1975](#)).

41 From the applied point of view, consider, for instance, the case of genome-wide association  
42 studies (GWAS) in humans. The original purpose of GWAS was to identify the causal  
43 genetic determinants of complex phenotypes, including diseases. This plan turned out to

44 be more complicated than expected (Visscher et al. 2017), with recent studies emphasizing  
45 the complex pleiotropic regulation of most human traits (Boyle et al. 2017; Wray et al.  
46 2018). Similarly, while specific prediction tools are indeed available, e.g., the development  
47 of polygenic risk scores to indicate a predisposition to disease (Torkamani et al. 2018), we  
48 are still far from unraveling which are the biological foundations behind their successes and  
49 failures.

50 Indeed, discovering mechanistic insights behind these GP associations has proven to be  
51 a significant challenge, owing partly to the large quantity of accepted causal elements distin-  
52 guished for most phenotypes. For instance, human quantitative traits were linked to only a  
53 few strong-effect determinants not long ago; a hypothesis that is now abandoned (Manolio  
54 et al. 2009; Boyle et al. 2017; Wray et al. 2018). A second factor is that natural selection  
55 weakens the impact of the *a priori* strongest statistical predictors (O'Connor et al. 2019).  
56 Most significant of all is the absence of an underlying developmental or physiological model  
57 explaining the emergence of the phenotype (Cannon and Mohlke 2018). Therefore, it is  
58 interesting to examine situations in which an explicit model replaces the black box and, in  
59 this way, one can better explain the causal characteristics.

60 There have been several attempts in this respect. Plant biology has pioneered works  
61 to connect gene network modeling with quantitative genetics, for example, on the predic-  
62 tion of flowering time (Welch et al. 2005). Other computational efforts to relate explicit  
63 phenotypic models and genetic variation include the cases of foliate-mediated one-carbon  
64 metabolism (Nijhout et al. 2017), single heart cells (Wang et al. 2012), or tooth develop-  
65 ment (Milocco and Salazar-Ciudad 2020).

66 In this manuscript, we follow the approach of quantitative genetics to study the emergence  
67 of statistical associations and the potential of phenotypic prediction in metabolism. While  
68 metabolism has historically been utilized to examine questions on the link between genetic  
69 variability and system-level organization since early discussions on aspects of the architecture  
70 of biological systems, see (Burns 1970; Kacser and Burns 1981; Clark 1991) to name a few,

71 these works employed toy models and could not benefit from the current accessibility of  
72 genome-scale metabolic network reconstructions.

73 Here, we explicitly use a reconstruction of *Saccharomyces cerevisiae* (Duarte 2004) to  
74 develop a variational approach in which we can study how phenotype variability emerges.  
75 Genome-scale models contain all the known metabolic reactions in an organism and the genes  
76 encoding each enzyme and enable the prediction of metabolic phenotypes, e.g., biomass, un-  
77 der situations in which genetics and environment can be controlled. Within this framework,  
78 we first discuss the concept of polygenic score to then examine the underlying biology be-  
79 hind its operation. This goal will make us explore the influence of the systems' architecture,  
80 genetic variability, and gene-environment interactions. We demonstrate that the balance be-  
81 tween functional mode and evolutionary history is crucial in revealing the limits of phenotype  
82 prediction with many implications.

## 83 RESULTS

### 84 Engineering genetic variation in metabolism

85 The genetic variation that exists in natural populations represents a multifactorial per-  
86 turbation that enables us to understand biological processes (Rockman 2008). Quantitative  
87 genetics employs this perturbation to quantify statistical associations with phenotypes with  
88 the use of a reference, or training, population of known phenotype. The approach leads  
89 to the so-called polygenic scores (PGSs, Fig. 1A), which can predict the manifestation of a  
90 particular trait given detailed genetic factors.

91 Our first objective will be to *engineer* the variational approach in the *in silico* metabolic  
92 framework. We consider whole-genome metabolic reconstructions and generate variability  
93 in gene dosages as a result of the genetic variability in the population. Dosages are relative  
94 to a maximal reference value resulting from the history of yeast metabolism. This reduced  
95 enzymatic performance is in line with earlier works (Kacser and Burns 1981; Keightley and  
96 Kacser 1987; Clark 1991) and are later interpreted quantitatively in the model by gene-  
97 reaction rules. These rules define which (and how) genes participate in reactions (Fig. 1B,

98 Fig. S1 and Methods).

99 The engineered variability induces individual differences in any potential metabolic trait,  
100 but we focus on the biomass production rate corresponding to the growth rate that is com-  
101 puted through flux balance analysis (FBA, Fig. 1B; Palsson 2006). Therefore, the entire  
102 procedure generates a data set of both genetic and phenotypic variations in the context of a  
103 metabolic model, which we can dissect to explain how the system works as a whole (Fig. 1C).

### 104 **A small subset of genes anticipates growth within a metabolic polygenic score**

105 We next derive a multidimensional PGS employing data of a population of yeast metabolisms  
106 that exhibit variability in their gene dosages as described before (growing in the standard  
107 medium, Methods). Such variability induces variation in growth and in many metabolic  
108 fluxes (Figs. 2AB and Fig. S2). We obtain a PGS aimed at estimating the individual growth  
109 rate (Methods). Figure 2C compares the growth rate prediction to the values computed  
110 with FBA for this training data set. The PGS successfully anticipates the phenotype with  
111 an  $R^2_{\text{train}} \sim 0.27$ , from here on abbreviated  $R^2$ .

112 Although this situation differs from those typically observed in association studies –where  
113 the number of predictors is several orders of magnitude larger than the training population  
114 size–, it is exemplary in that we can easily overcome data shortcomings and hence the exact  
115 fit to the training data (statistical overfitting). That said, PGSs tend to lose predictive power  
116 when applied to a different *test* population. To evaluate this, we systematically generated  $10^4$   
117 independent test data, each with the same size and mutational distribution as the training  
118 population. For each test we computed the  $R^2_{\text{test}}$  to obtain a mean  $\langle R^2_{\text{test}} \rangle = 0.24 \pm 0.01$  for  
119 the full set. This reveals that the computed PGS slightly overfitted the training data, and  
120 that we should expect a small loss of predictability when applied to different test populations  
121 ( $R^2 > \langle R^2_{\text{test}} \rangle$  with  $p < 4 \times 10^{-3}$ ).

122 The derived PGS includes all metabolic genes and their corresponding effect sizes,  $\beta$ ,  
123 coupled to the prediction (Methods). We identify 85 genes of non-null effect, 32 of which are  
124 comparatively large ( $|\beta| > 0.01$ ; Fig. 2DE). The latter impacts 61 metabolic reactions (out of

125 1148). The large number of genes with null effect size is surely related to the fact that most  
126 of the fluxes are inactivated in the considered standard medium (individual metabolisms  
127 within the population typically show  $\sim 73\%$  of null fluxes) something that characterizes a  
128 distinct metabolic "functional mode" (a relevant notion in what follows). From now on, we  
129 focus on the subset of genes with larger effect sizes.

### 130 **Few metabolic functions limit growth**

131 What type of functions implement the predictor genes? One could think that predictors  
132 are distributed across all metabolic activities in the sense of universal pleiotropy (Kacser  
133 and Burns 1981). However, we only find a few metabolic subsystems enriched by predictors  
134 (Methods; Fig. S3). While these include the metabolisms of a variety of amino acids (va-  
135 line, lysine, histidine), fatty acids, and phospholipids, it is surprising the absence of other  
136 subsystems central to metabolism like glycolysis or the citric acid cycle. These results are  
137 substantiated with a separate GO enrichment analysis (Table S1).

138 We observed that the detected subsystems involve specifically the production of biomass  
139 precursors. This group of metabolites fuels the biomass reaction, which defines the archi-  
140 tecture of growth –as the trait of interest– in metabolic reconstructions (Fig. S4 shows its  
141 stoichiometry; this incorporates, for instance, the crucial role of amino acids and phospho-  
142 lipids for protein synthesis and the cell membrane, respectively, etc.). Consequently, we next  
143 hypothesized that the relevance of genetic predictors stems from their direct contribution to  
144 the pool of biomass precursors (Fig. 3A).

145 Figure 3B shows the mean aggregate metabolite production (or consumption, if negative)  
146 associated with all predictors in the population of metabolisms (Methods; Fig. S2B and S5).  
147 The strongest predictors only contribute significantly to a subset of precursors (11 out of 43),  
148 and in some cases, e.g., valine, lysine, etc., this represents the total production that is required  
149 for growth. Therefore, the functional mode, active on the standard medium, effectively  
150 selects a domain within the entire architecture of growth. Of note, while the contribution to  
151 these factors is *direct* for only 9 genes –that are precisely producing these biomass precursors–,

152 the rest of the predictors have an effect on growth in a somehow distributed manner.

153 The case of histidine is exemplary (Fig. 3C). While it is produced only by *his4*, all  
154 histidine-related genes are crucial to providing intermediary precursors and thus are strongly  
155 involved in its overall production. This explains the case of *pmi40*, *sec53*, *dpm1* and *psa1*,  
156 which are predictor genes found upstream of the production of mannan, another important  
157 biomass precursor, while *pmt1-6* that ultimately produce said metabolite have null effect  
158 sizes. The same occurs with *erg4* and the production of sterol.

### 159 **Pleiotropy is not a good measure of growth predictor character**

160 The results before underline that the top predictors include genes that directly alter the  
161 availability of the limiting biomass precursors and also genes whose impact comes through  
162 other upstream reactions. Could the systemic properties of metabolism capture this second  
163 aspect? We consider here first the pleiotropic character of a gene. One quantifies pleiotropy in  
164 metabolic models as the number of biomass precursors whose maximal production becomes  
165 reduced by changing the dosage of a gene (Shlomi et al. 2007). The score thus includes  
166 system-wide phenomena like metabolic compensation, rewiring, redundancy, etc.

167 Within the highly pleiotropic genes, only some display large effect sizes on the PGS  
168 (Fig. 4A). This outcome might indicate that not all biomass precursors incorporated in the  
169 pleiotropic score limit growth (they do not all contribute to the operational functional mode  
170 in the standard medium). Indeed, we confirm that our set of predictors are all especially  
171 pleiotropic towards the group of biomass precursors already identified in the previous section,  
172 namely a few amino acids, phospholipids, mannan and sterol (Fig. 4B). This reflects that  
173 pleiotropy fails at pinpointing relevant genes for growth prediction since it is an aggregate  
174 measure that includes the effect of a mutation across *all* biomass precursors, while only  
175 a limiting few ones matter. On the contrary, separating the individual contributions of  
176 mutations to different functions results in a valid list of metabolites that potentially limit  
177 growth.

## 178 **Growth predictors display either large additive or epistatic effects**

179 A second systemic measure is epistasis (indicating gene-gene interactions). We present  
180 an approach based on *global* sensitivity analysis that allows quantifying the additive and  
181 nonadditive effect of individual gene dosages on growth variability. Two indices,  $S_0$  and  $\epsilon_T$ ,  
182 quantify such additive and nonadditive ("total order" epistasis) contributions, respectively  
183 (Methods and Supplementary Material).

184 Figure 4C shows that some predictor genes have large additive effects,  $S_0$ , and small  
185 total epistasis,  $\epsilon_T$  (*ino1*, *his3*, ...), whereas others display the opposite pattern (*cho1*, *his1*).  
186 Importantly, the sum of all effects, additive and epistatic, shows the maximum correlation  
187 with the effect sizes obtained in the PGS (Pearson's  $\rho > 0.97$ , Fig. 4D and Fig. S6). That  
188 the fraction of genes displaying  $S_0 > \epsilon_T$  and  $S_0 < \epsilon_T$  is comparable highlights that the large  
189 effect sizes we obtain are associated with genes enriched by additive effects (something to be  
190 expected from a linear statistical formalism) but also with those with strong epistatic effects  
191 (which appears paradoxical, see the Discussion; see also Figs. S7 and S8, and Supplementary  
192 Material for an alternative sensitivity analysis where the growth response coefficients are  
193 analyzed).

194 Is there a structural basis for large  $S_0$  or  $\epsilon_T$ ? We investigate their relationship with  
195 several measures for each gene: the number of (active) reactions involved, the amount of  
196 flux they control, and the number of (precursor) metabolites they utilize. Among these,  
197 we find the largest correlations of  $S_0$  (and  $\epsilon_T$ ) with the number of reactions they control,  
198  $\rho = -0.19$  ( $\rho = 0.19$ ), and the log of the summed absolute flux through their reactions,  
199  $\rho = 0.23$  ( $\rho = -0.22$ ). Therefore, one expects large additive effects to stem from genes that  
200 regulate a small number of reactions of larger flux. In opposition, genes that control a larger  
201 number of reactions with less flux result in larger epistatic effects.

## 202 **Optimal genetic variability for predictability**

203 Beyond the previous systemic attributes, we now examine how the genetic variability  
204 accessible within a population, measured by its standard deviation  $\sigma_G$ , modifies the capacity



205 to predict the phenotype. We use ten populations with equal mean dosage and increasing  
206  $\sigma_G$  (Fig. 5AB; Methods) to compute the corresponding growth rates with FBA and also to  
207 train a PGS in each case.

208 Notably, the output of the PGS (coefficient of determination  $R^2$ ) reaches a maximal  
209 optimal value for a given  $\sigma_G$  (Fig. 5C). This value results from the association of stronger  
210 effect sizes to the same genetic predictors found previously (Fig. 2D). Yet a better  $R^2$  comes  
211 at the cost of a decreased mean population fitness. Besides, in populations with large genetic  
212 variability,  $\sigma_G > 0.14$ , the PGS' performance declines owing to an increased number of large  
213 effect predictors resulting from additional growth limiting reactions (Fig. 5D).

214 Next, we discover that although the main genetic predictors identified across all PGSs are  
215 identical, the effect sizes change quantitatively with genetic variability. Thus, the estimated  
216 impact of a mutation, e.g., reduction of 20% of a specific enzyme, will have a differential  
217 effect depending on the genetic background of the individual, which limits the suitability of  
218 applying a PGS on individuals if the test and training populations widely differ.

219 These results reveal overall a trade-off between genetic variability, population fitness, and  
220 predictability. While it is desirable to increase the performance of a PGS through sampling  
221 a population with high genetic variability, negative selection is likely to prevent scenarios of  
222 optimal predictability (O'Connor et al. 2019). Thus, selection would pose severe limitations  
223 to phenotype prediction.

### 224 **Prediction is transportable across environments but also experiences extreme** 225 **gene-environment interactions.**

226 In our last analysis, we ask to what extent specific growing conditions influence the  
227 ability to predict growth, modifying, in turn, the collection of the predictors. Therefore, we  
228 randomly generated  $>10^3$  (nutrient) environments of increasing richness (fixing the genetic  
229 variability as before, Methods). Then we train a separate PGS (for growth in every medium;  
230 Fig. 6A) to focus on the genes with the largest effect sizes ( $|\beta| > 0.01$ , as previously).

231 Figure 6B shows the effect sizes of each gene depending on medium richness. The top

232 predictors identified previously appear recurrently in most media with increasing effect sizes  
233 in richer environments. Thus, they constitute a *core* set of predictors valid for most environ-  
234 ments. Could this reflect that the growth medium has a limited impact on which reactions  
235 are active? Indeed, there exist between 70% and 100% of shared active fluxes across all  
236 random environments, and >99% if we consider reactions controlled by our initial set of top  
237 predictors. This explains the identification of similar genetic predictors across environments.  
238 Nevertheless, we observe a second general trend in poor media, where a novel set of predic-  
239 tors related to the mitochondrial respiratory chain –a different functional mode– becomes  
240 relevant.

241 One could still argue that the differences in predictability are due to subtle differences in  
242 metabolic solutions. We thus controlled for environmental richness to quantify this. Differ-  
243 ences in metabolic solutions do not correlate with predictability (Pearson's  $\rho = 0.06$ , using  
244 partial correlations to control for environmental richness), further pointing towards envi-  
245 ronmental richness as a valid measure that recapitulates metabolic activity and similarity,  
246 anticipating predictability (Fig. 6C).

247 Next, we observe that other genes recurrently appear as strong predictors in specific  
248 –typically poor– media (Fig. 6B), and whose occurrence leads to particularly strong PGS  
249 performance with up to  $R^2 = 0.56$  (Fig. 6C). Therefore, while growth prediction usually relies  
250 on a core set of genes largely "independent" of the growing medium, strong gene-environment  
251 interactions can sizeably improve the performance of a PGS.

252 Finally, the fact that the effect sizes change continuously with increasing environmental  
253 richness (Fig. 6B-D) ensures the "portability" of a singular PGS (trained in a reference  
254 medium) to predict the growth rate of the same population in another medium of similar  
255 richness (Fig. 6E). Figure 6F shows the performance of a PGS trained with data of the  
256 standard medium to predict the growth rates obtained in different random media (as test  
257 populations). Indeed, we observe that beyond a certain environmental similarity (Methods)  
258 the portability of  $\text{PGS}_{\text{std}}$  falls sharply together with the number of overlapping predictors

259 between  $\text{PGS}_{\text{std}}$  and  $\text{PGS}_i$  (trained in the  $i$ -eth random environment). This enables us to  
260 distinguish regimes of high and low portability.

## 261 DISCUSSION

262 We developed a framework to generate genetic and phenotypic variability in a population  
263 of *in silico* yeast metabolisms to study how and why a polygenic score (PGS) can anticipate  
264 the phenotype (growth rate) from a specific enzymatic profile. Metabolic reconstructions are  
265 arguably the best-suited models to inspect these questions as they incorporate genetic and  
266 environmental information into an explicit GP map that renders the PGS accountable for  
267 its predictions (Kavvas et al. 2020). The quantitative interpretation of gene reaction rules  
268 (GRRs) is a fundamental layer contributing to an accurate representation of this map.

269 In this way, if we reveal how the associations that define the PGS arise, we can begin  
270 recognizing general limitations of predictability, which have important implications for fun-  
271 damental (Burns 1970; Boyle et al. 2017), and applied biology (Dudbridge 2013; Torkamani  
272 et al. 2018; Kavvas et al. 2020). Specifically, we evaluated the limitations originated by i)  
273 biological and evolutionary constraints of the metabolism, ii) knowledge of the trait archi-  
274 tecture, iii) non-linearities in the GP map, iv) influence of the environment, and v) genetic  
275 makeup of the training population.

276 Computing a case study, we obtain an  $R^2 = 0.27$  and 32 genetic predictors with notably  
277 large effect sizes (Fig. 2DE). Which genes act as predictors result from the combination  
278 of two factors: the quantitative flux *required* in a certain environment and the flux con-  
279 straints *derived* from the corresponding genetic variation (Fig. S9A). The former represents  
280 the “functional mode” of metabolism in that environment, while the latter results from the  
281 combination of GRRs and what we define as the "historical" reference flux bounds. These  
282 bounds represent the consequence of the adjustment of the yeast metabolism to onetime  
283 experienced evolutionary history.

284 Therefore, both GRRs and the reference bounds can act as a sieve of genetic variation  
285 causing part of it to be cryptic (Richardson et al. 2013; Paaby and Rockman 2014; Poy-

286 atos 2020). GRRs could symbolize, for instance, the presence of an isozyme which would  
287 prevent such enzyme from becoming a phenotypic predictor. Moreover, reference bounds  
288 might largely differ from the required flux in a given environment, which again silences the  
289 functional impact of the genetic variability present in the population. We confirmed the  
290 latter effect in two experiments where we manipulated the reference fluxes (Fig. S9B).

291 The presence of the 32 distinct predictors, and their enrichment in a few metabolic func-  
292 tions, is thus contingent on both working regime and evolutionary history. Note, however,  
293 that these functions should be necessarily associated with biomass precursors, either di-  
294 rectly or in upstream reactions, since the biomass reaction represents the architecture of the  
295 trait/phenotype of interest (Fig. 3AB).

296 Shifting our focus on systemic features, we can report several results. Pleiotropy, as an  
297 aggregate score of the impact of mutations on all biomass precursors, is a poor measure of  
298 the predictive character of a gene, with the disaggregate information nevertheless partially  
299 revealing the composition of the biomass reaction (Fig. 4B). Therefore, the PGS provides  
300 a sound but partial understanding of the architecture of the trait, exclusively the domain  
301 associated with the required precursors in a given environment.

302 We also discussed epistasis. Those genes whose dosages are eventually confining growth  
303 induce the non-linearities in the metabolic GP map, a combination of the working regime, i.e.,  
304 functional mode, and evolutionary history as discussed above. On this basis, individuals are  
305 instances where only one, or few, dosages are particularly limiting, the exact ones varying  
306 among them (Fig. S8). But the mixture of individuals at the population level generates  
307 functional cross-dependencies, increasing the number of limiting enzymes and consequently  
308 reducing predictability (more inadequate predictions correlate with predictor number, linear  
309  $\rho = -0.94$ , Fig. S9C).

310 This reasoning helps clarify two added phenomena. First, it describes the beneficial ef-  
311 fect of sufficiently large gene-by-environment interactions on predictability (fewer predictors,  
312 better predictability, Fig. 6C). Second, it anticipates a conjecture where a metabolism "dis-

313 abled" on its capacity to react to genetic variation would paradoxically be coupled to better  
314 prediction. This premise, we proved (impairment causes simpler functional modes that lead  
315 too to fewer predictors, Fig. S9D).

316 Moreover, the validity of linear methods to predict the outcome of highly non-linear  
317 GP maps has intrigued the genetics community. Global sensitivity analysis confirms the  
318 suitability of these approaches (effect sizes capture the sum of both additive and epistatic  
319 contributions, Fig. 4D). Indeed, a PGS should capture non-linearities, since the minimization  
320 of error due to a linear regression incorporates all data points, including those coupled to  
321 non-linear regimes. Still and despite the presence of epistatic effects we notice that the sum  
322 of additive terms accounts for over 75% of the total phenotype variability ( $\sum S_0 > 0.75$ ,  
323 Fig. 4C), certainly owing to order-preservation of gene-dosage responses (Fig. S8; [Gjuvsland  
324 et al. 2011](#)). In sum, the linearity of the PGS *a priori* imposes a fundamental constraint on  
325 anticipating non-linear effects but it can nevertheless partially integrate them. This trade-off  
326 illustrates to what extent the GP map can be described linearly ([Hill et al. 2008](#)).

327 Finally, we asked about the portability of the predictions across populations concerning  
328 differences in genetic and environmental situations. Populations experiencing an interme-  
329 diate genetic variability ensure maximum predictability, in line with previous results on  
330 extreme allele frequencies ([Hill et al. 2008](#)). However, such an increase in  $R^2$  comes at the  
331 cost of population growth (Fig. 5B). Achieving this maximum could then be unattainable  
332 due to negative selection ([O'Connor et al. 2019](#)), which could be interpreted as yet another  
333 constraint on predictive power. In GP contexts in which genetic variability is less likely to  
334 cause loss of function and more forms of gain of function are possible, this constraint will be  
335 less apparent, as variability will not elicit negative selection.

336 Notably, the list of genetic predictors remains largely the same, independent of the  
337 amount of genetic variability in the training population (Fig. 5D). This is also observed  
338 when one determines predictors associated with populations growing in different media of  
339 similar richness, with two consequences (Fig. 6D). First, these results ensure the portability

340 of the PGSs. Second, and as stated before, the predictors are specific to the evolutionary  
341 history of the metabolism. As a consequence, portability might not necessarily hold for more  
342 fixed, and maybe more realistic, histories.

343 Perhaps the most unifying research program of all questions currently being addressed  
344 in biology is that of phenotype prediction. Here, we have learned that the combination of  
345 functional mode, evolutionary history, and phenotypic architecture determines the limits of  
346 prediction. For this, we benefited from an *in silico* approach whose capabilities to examine  
347 the emergence of phenotypic variation are beyond current experimental setups. The debate  
348 on the need to understand our predictions is sure to spark many interesting future discussions.

## 349 MATERIALS AND METHODS

### 350 Metabolic models

351 Whole-genome metabolic models integrate the stoichiometry of the reactions in the metabolism  
352 of a model species, and together with computational methods they enable the estimation  
353 of an optimal network solution given an objective function where fluxes are stable. Among  
354 all fluxes, we focus on the prediction of biomass production, an analogue of growth rate  
355 and fitness. We used the genome-scale metabolic reconstruction of *Saccharomyces cerevisiae*  
356 iND750 (Duarte 2004) together with the Cobra toolbox for Python (Ebrahim et al. 2013) to  
357 compute the fitness of numerous mutants in either a standard medium or random media and  
358 the Escher package to depict the central carbon metabolism (King et al. 2015). Metabolic  
359 subsystems are typically assigned to reactions, hence we imputed a specific subsystem to  
360 a gene only if all reactions in which it participates belong to the same subsystem. Among  
361 all 750 genes present in the model, 42 of them had either none or multiple subsystems as-  
362 sociated, which we discarded. Note that our choice of model tries to balance the presence  
363 of sufficient biological details with accessible computational time. Still, our results and the  
364 mechanisms underlying phenotype prediction are robust when using the most recent yeast  
365 metabolic reconstructions iMM904 and yeast8 ( $R^2 = 0.18$  and  $R^2 = 0.17$ , respectively).

## 366 **Quantitative mutations**

367 We compute the effect of a quantitative reduction in gene dosage, or equivalently enzyme  
368 efficiency, in two steps (Fig. S1). First, we compute the wild type "reference" bounds of  
369 each reaction. These bounds are constituted by the maximum (and minimum if reversible)  
370 reaction fluxes observed in  $2 \times 10^4$  optimal solutions of metabolisms exposed to random en-  
371 vironments, and random genetic backgrounds (Methods). In the latter case, we randomly  
372 sampled flux bounds from a uniform distribution in the range [0,100]. In this way, the wild  
373 type bounds integrate the history of yeast metabolisms, which have adapted to different  
374 environmental and genetic contexts (Discussion).

375 Second, we interpret quantitatively the gene reaction rules (GRRs) to find how reducing  
376 the dosage of an enzyme translates into a reduced flux through its reactions with respect  
377 to the wild type. This is necessary because some reactions may require several subunits  
378 or just one of several isozymes. The GRRs may contain AND and OR operators acting on  
379 pairs of genes, we consider these equivalent to `min` and `sum`, respectively, acting on relative  
380 gene dosages. This approach is similar to those used in noise propagation ([Wang and Zhang  
381 2011](#)), or by the Escher package ([King et al. 2015](#)). In all cases, the upper/lower bounds are  
382 always computed and set according to the reactions' reversibility and the bounds of ATP  
383 maintenance, biomass production and exchange reactions are kept unaltered.

384 This procedure is comparable to a previous approach in which genetic variability was  
385 also mapped to flux constraints ([Kavvas et al. 2020](#)). The authors construct the allele-to-  
386 flux constraint map coupled to the performance of a novel objective function to classify  
387 antibiotic resistance in a fixed medium. Our approach, however, assumes flux constraints  
388 imposed by a history of past genetic and environmental adaptations and, in this sense it is  
389 more comprehensive, together with explicit information about which genes are involved in  
390 exact reactions (GRRs).

## 391 Genetic variability

392 We generate genetic variability by sampling gene dosages from a probability distribution.  
393 Unless otherwise stated, we use a normal distribution with unit mean and standard deviation  
394  $\sigma = 0.1$ . In this way,  $\sigma$  directly reflects the variability in the population's gene dosages. This  
395 distribution follows from either Fisher's original infinitesimal model, or from the Gaussian  
396 Descendants derivation where different levels of parenthood result in different  $\sigma$  under neutral  
397 evolution ([Barton et al. 2017](#); [Turelli 2017](#)). We define the wild type genotype as having  
398 all gene dosages equal to the unit. This procedure generates populations that are in linkage  
399 equilibrium.

400 We also engineered genetic variability based on gamma distributions with shape param-  
401 eters  $0.5 < k < 200$  and scale adjusted such that all distributions had equal mean. Impor-  
402 tantly, note that gene dosages  $>1$  are not beneficial, as wild type bounds are the extreme  
403 values observed (statistically), thus to avoid including additional cryptic genetic variation,  
404 gene dosages  $>1$  were clipped to the unit. In this way, the resulting genetic variability in  
405 our standard population is  $\sigma_G = 0.05$  (Fig. 5).

## 406 Growth media and environmental variability

407 The minimal medium is defined by unbounded import and export of H<sub>2</sub>O, CO<sub>2</sub>, ammonia,  
408 phosphate, sulphate, sodium and potassium and it is aerobic with 2 mmol/gDW/h import  
409 rate of O<sub>2</sub>. The standard medium is additionally composed of 20mmol/gDW/h import rate  
410 of glucose. Random environments are generated following a previous protocol ([Wang and  
411 Zhang 2009](#)). Briefly, we supplement the minimal medium with an additional number of  
412 components such that the probability of including any component follows an exponential  
413 distribution with mean  $m = 0.10$  (other values produce similar results). Then, for every  
414 component, we obtain their maximum import rates from a uniform distribution between 0  
415 and 20 mmol/gDW/h.

416 We define the richness of a medium as the growth rate of the wild type, and the envi-  
417 ronmental similarity between two media as the ratio of their richness. To avoid including



418 arbitrarily rich media, we consider those with richness inferior, or equal to that of the stan-  
419 dard medium. Also, we discard media that support biomass production rates <70% of  
420 that of the standard medium to avoid possible natural or model artifacts related to our  
421 implementation of quantitative mutations (see Results). This is an alternative approach to  
422 Constrained Allocation FBA (CAFBA), which limits the growth rate of metabolic models  
423 based on resource allocation principles by fixing a medium and tuning a parameter related  
424 to proteome fractioning (Mori et al. 2016).

## 425 **Polygenic Score**

426 We used a high-dimensional regression framework for polygenic modeling and prediction:

$$427 \quad \vec{y}_{N \times 1} = \mathbf{G}_{N \times M} \vec{\beta}_{M \times 1} + \vec{\epsilon}_{N \times 1}, \quad (1)$$

428 where  $N$  is the sample size,  $M$  is the number of genes,  $\vec{y}$  is the vector of phenotypes (typi-  
429 cally growth rate),  $\mathbf{G}$  is the genotype matrix,  $\vec{\beta}$  is the vector of effect sizes of the genes and  
430  $\vec{\epsilon}$  is some noise assumed normal with unknown variance. The generated data was fit using  
431 Least Absolute Shrinkage and Selection Operator (LASSO) a type of regression that under  
432 bayesian statistics assumes prior Laplace distributions in each coefficient, instead of uniform  
433 distributions as in the case of Ordinary Least Squares. Consequently, with LASSO some  
434 parameters are automatically zero (Tibshirani 1996), hence making it a remarkable alterna-  
435 tive to pruning and thresholding (P+T) or other regularization methods (Dudbridge 2013;  
436 Wray et al. 2013). In addition, we compute the best value of the shrinkage parameter with  
437 five-fold cross validation. That effect sizes show a bimodal distribution makes our results  
438 robust to the application of other regularization, or feature selection methods (Fig. 2E).

## 439 **Sensitivity analysis and total epistasis**

440 We computed local sensitivity indices  $Z_i$  to monitor the changes in the output variable, i.e.,  
441 growth rate, when every single input variable, i.e., each gene dosage, is altered (Kacser and  
442 Burns 1981; Keightley 1989). However, local sensitivity analysis (results are available in

443 the Supplementary Material) does not explore the entire parameter space and is unable to  
444 isolate the effect of (non-linear) variable interactions.

445 Global sensitivity analysis, however, is ideal for this task, as it decomposes the variabil-  
446 ity of the output of a model into different terms when all variables fluctuate simultaneously.  
447 We used the method first proposed by Sobol for its easy implementation and interpreta-  
448 tion (Sobol 1993; Saltelli et al. 2008). Note that this differs from previous flux-based ap-  
449 plications (Nguyen Quang et al. 2019; Nobile et al. 2021). Briefly, we focus on two indices  
450 for the  $i$ -eth gene, the first order index  $S_0^i$  and the total effect index  $S_T^i$ . The former quan-  
451 tifies the additive part of the variability associated to a gene while the latter quantifies its  
452 total contribution, additive and all non-additive effects. From these, we derive the total  
453 epistasis which accounts for all, and only, non-additive effects as  $\epsilon_T^i = S_T^i - S_0^i$  and its error  
454  $(\Delta\epsilon_T^i)^2 = (\Delta S_0^i)^2 + (\Delta S_T^i)^2$ .

455 We computed all indices and their errors with monte carlo estimators using over  $10^6$  sam-  
456 ples (Saltelli et al. 2008; Saltelli et al. 2010). We carried out these computations with pairs  
457 of genotypes sampled from the original population growing in standard medium. A detailed  
458 description of the protocol and equations are available in the Supplementary Material.

459 Note that we do not show negative values of both  $S_0$  and  $\epsilon_T$  as they are unrealistic and  
460 should be considered null in agreement with their error bounds.

## 461 **Pleiotropy**

462 In metabolic models, the pleiotropy of a mutation is generally computed as the number of  
463 biomass precursors whose maximum production is limited by the mutation, following a pre-  
464 vious protocol (He and Zhang 2006; Shlomi et al. 2007). Briefly, we simulated the excretion  
465 of a given metabolite by adding an exchange reaction to the model and maximizing the flux  
466 through this reaction. Then we consider that a gene limits the production of a metabolite  
467 if, when knocked-down by 90%, its excretion rate decreases. As pleiotropy is strongly de-  
468 pendent on the genetic context, we computed the mean value across  $10^3$  individuals of the  
469 population due to the large computational load. We used a 90% decrease in dosage to avoid

470 artifacts derived from gene essentiality, but our results are robust when using other values.

## 471 DATA AVAILABILITY

472 Data and code for this work is available at Zenodo ([Yubero 2022](#)). The main code used  
473 to generate quantitative mutations is available at GitHub ([https://github.com/pyubero/  
474 quantitative\\_mutations](https://github.com/pyubero/quantitative_mutations)).

## 475 ACKNOWLEDGEMENTS

476 This work was supported by grant PID2019-106116RB-I00 (P.Y. and J.F.P.), partially  
477 by Ph.D. fellowship BES-2016-079127 (P.Y.), and the program Severo Ochoa Center of Ex-  
478 cellence (A.A.L.) from the Spanish Ministerio de Ciencia e Innovación and the European  
479 Social Fund.

## 480 AUTHOR CONTRIBUTIONS

481 P.Y., A.A.L., and J.F.P. conceived and designed the study. P.Y. conducted all analysis  
482 with contributions from A.A.L. and J.F.P. P.Y and J.F.P. discussed the results and wrote  
483 the manuscript. All authors reviewed and approved the final manuscript.

## 484 COMPETING INTERESTS

485 The authors declare no competing interests

## 486 MATERIALS CORRESPONDENCE

487 Correspondence and request for materials should be addressed to J.F.P.

## 488 REFERENCES

- 489 Barton, N., Etheridge, A., and Véber, A. (2017). “The infinitesimal model: Definition, deriva-  
490 tion, and implications.” *Theoretical Population Biology*, 118, 50–73.
- 491 Boyle, E. A., Li, Y. I., and Pritchard, J. K. (2017). “An Expanded View of Complex Traits:  
492 From Polygenic to Omnigenic.” *Cell*, 169(7), 1177–1186.

- 493 Burns, J. (1970). “The synthetic problem and the genotype-phenotype relation in  
494 metabolism.” *Organization, Stability and Process. Towards a Theoretical Biology*, C.H.  
495 Waddington editor, 3, 47–51.
- 496 Cannon, M. E. and Mohlke, K. L. (2018). “Deciphering the Emerging Complexities of Molec-  
497 ular Mechanisms at GWAS Loci.” *The American Journal of Human Genetics*, 103(5),  
498 637–653.
- 499 Clark, A. G. (1991). “Mutation-selection balance and metabolic control theory.” *Genetics*,  
500 129(3), 909–923.
- 501 Duarte, N. C. (2004). “Reconstruction and validation of *saccharomyces cerevisiae* iND750, a  
502 fully compartmentalized genome-scale metabolic model.” *Genome Research*, 14(7), 1298–  
503 1309.
- 504 Dudbridge, F. (2013). “Power and Predictive Accuracy of Polygenic Risk Scores.” *PLoS*  
505 *Genetics*, 9(3), e1003348.
- 506 Ebrahim, A., Lerman, J. A., Palsson, B. O., and Hyduke, D. R. (2013). “Cobrapy:  
507 Constraints-based reconstruction and analysis for python.” *BMC Systems Biology*, 7(1),  
508 74.
- 509 Feldman, M. W. and Lewontin, R. C. (1975). “The Heritability Hang-Up: The role of variance  
510 analysis in human genetics is discussed.” *Science*, 190(4220), 1163–1168.
- 511 Gjuvslund, A. B., Vik, J. O., Woolliams, J. A., and Omholt, S. W. (2011). “Order-preserving  
512 principles underlying genotype–phenotype maps ensure high additive proportions of ge-  
513 netic variance.” *Journal of Evolutionary Biology*, 24(10), 2269–2279.
- 514 He, X. and Zhang, J. (2006). “Toward a Molecular Understanding of Pleiotropy.” *Genetics*,  
515 173(4), 1885–1891.
- 516 Hill, W. G., Goddard, M. E., and Visscher, P. M. (2008). “Data and theory point to mainly  
517 additive genetic variance for complex traits.” *PLOS Genetics*, 4(2), 1–10.
- 518 Kacser, H. and Burns, J. A. (1981). “The molecular basis of dominance.” *Genetics*, 97(3-4),  
519 639–666.

- 520 Kavvas, E. S., Yang, L., Monk, J. M., Heckmann, D., and Palsson, B. O. (2020). “A  
521 biochemically-interpretable machine learning classifier for microbial gwas.” *Nature Com-*  
522 *munications*, 11(1), 2580.
- 523 Keightley, P. D. (1989). “Models of quantitative variation of flux in metabolic pathways.”  
524 *Genetics*, 121(4), 869–876.
- 525 Keightley, P. D. and Kacser, H. (1987). “Dominance, pleiotropy and metabolic structure.”  
526 *Genetics*, 117(2), 319–329.
- 527 King, Z. A., Dräger, A., Ebrahim, A., Sonnenschein, N., Lewis, N. E., and Palsson, B. O.  
528 (2015). “Escher: A web application for building, sharing, and embedding data-rich visual-  
529 izations of biological pathways.” *PLOS Computational Biology*, 11(8), e1004321.
- 530 Lynch, M. and Walsh, B. (1998). *Genetics and analysis of quantitative traits*. Sinauer, Sun-  
531 derland, Mass.
- 532 Manolio, T. A., Collins, F. S., Cox, N. J., Goldstein, D. B., Hindorff, L. A., Hunter, D. J.,  
533 McCarthy, M. I., Ramos, E. M., Cardon, L. R., Chakravarti, A., Cho, J. H., Guttmacher,  
534 A. E., Kong, A., Kruglyak, L., Mardis, E., Rotimi, C. N., Slatkin, M., Valle, D., Whitte-  
535 more, A. S., Boehnke, M., Clark, A. G., Eichler, E. E., Gibson, G., Haines, J. L., Mackay,  
536 T. F. C., McCarroll, S. A., and Visscher, P. M. (2009). “Finding the missing heritability  
537 of complex diseases.” *Nature*, 461(7265), 747–753.
- 538 Milocco, L. and Salazar-Ciudad, I. (2020). “Is evolution predictable? Quantitative genetics  
539 under complex genotype-phenotype maps.” *Evolution*, 74(2), 230–244.
- 540 Mori, M., Hwa, T., Martin, O. C., De Martino, A., and Marinari, E. (2016). “Constrained  
541 allocation flux balance analysis.” *PLOS Computational Biology*, 12(6), 1–24.
- 542 Nguyen Quang, M., Rogers, T., Hofman, J., and Lanham, A. B. (2019). “Global sensitivity  
543 analysis of metabolic models for phosphorus accumulating organisms in enhanced biolog-  
544 ical phosphorus removal.” *Front. Bioeng. Biotechnol.*, 7, 234.
- 545 Nijhout, H. F., Sadre-Marandi, F., Best, J., and Reed, M. C. (2017). “Systems Biology of  
546 Phenotypic Robustness and Plasticity.” *Integrative and Comparative Biology*, 57(2), 171–

- 547 184.
- 548 Nobile, M. S., Coelho, V., Pescini, D., and Damiani, C. (2021). “Accelerated global sensi-  
549 tivity analysis of genome-wide constraint-based metabolic models.” *BMC bioinformatics*,  
550 22(Suppl 2), 78–78.
- 551 O’Connor, L. J., Schoech, A. P., Hormozdiari, F., Gazal, S., Patterson, N., and Price, A. L.  
552 (2019). “Extreme Polygenicity of Complex Traits Is Explained by Negative Selection.” *The*  
553 *American Journal of Human Genetics*, 105(3), 456–476.
- 554 Omholt, S. W., Plahte, E., Øyehaug, L., and Xiang, K. (2000). “Gene Regulatory Networks  
555 Generating the Phenomena of Additivity, Dominance and Epistasis.” *Genetics*, 155(2),  
556 969–980.
- 557 Orrell, D. (2007). *The Future of Everything. The Science of Prediction*. Basic Books.
- 558 Paaby, A. B. and Rockman, M. V. (2014). “Cryptic genetic variation: evolution’s hidden  
559 substrate.” *Nature Reviews. Genetics*, 15(4), 247–258.
- 560 Palsson, B. (2006). *Systems biology: properties of reconstructed networks*. Cambridge Uni-  
561 versity Press, Cambridge ; New York OCLC: ocm62421240.
- 562 Poyatos, J. F. (2020). “Genetic buffering and potentiation in metabolism.” *PLOS Computa-*  
563 *tional Biology*, 16(9), 1–15.
- 564 Richardson, J. B., Uppendahl, L. D., Traficante, M. K., Levy, S. F., and Siegal, M. L. (2013).  
565 “Histone Variant HTZ1 Shows Extensive Epistasis with, but Does Not Increase Robustness  
566 to, New Mutations.” *PLoS Genetics*, 9(8), e1003733.
- 567 Rockman, M. V. (2008). “Reverse engineering the genotype–phenotype map with natural  
568 genetic variation.” *Nature*, 456(7223), 738–744.
- 569 Saltelli, A., Annoni, P., Azzini, I., Campolongo, F., Ratto, M., and Tarantola, S. (2010).  
570 “Variance based sensitivity analysis of model output. design and estimator for the total  
571 sensitivity index.” *Computer Physics Communications*, 181(2), 259–270.
- 572 Saltelli, A., Ratto, M., Andres, T., Campolongo, F., Cariboni, J., Gatelli, D., Saisana, M.,  
573 and Tarantola, S. (2008). *Global Sensitivity Analysis: The Primer*. Wiley.

- 574 Shlomi, T., Herrgard, M., Portnoy, V., Naim, E., Palsson, B. Ø., Sharan, R., and Rup-  
575 pin, E. (2007). “Systematic condition-dependent annotation of metabolic genes.” *Genome*  
576 *Research*, 17(11), 1626–1633.
- 577 Sobol, I. M. (1993). “Sensitivity analysis for non-linear mathematical models.” *Mathematical*  
578 *modelling and computational experiment*, 1, 407–414.
- 579 Tibshirani, R. (1996). “Regression shrinkage and selection via the lasso.” *Journal of the Royal*  
580 *Statistical Society: Series B (Methodological)*, 58(1), 267–288.
- 581 Torkamani, A., Wineinger, N. E., and Topol, E. J. (2018). “The personal and clinical utility  
582 of polygenic risk scores.” *Nature Reviews Genetics*, 19(9), 581–590.
- 583 Turelli, M. (2017). “Commentary: Fisher’s infinitesimal model: A story for the ages.” *Theo-*  
584 *retical Population Biology*, 118, 46–49.
- 585 Visscher, P. M., Wray, N. R., Zhang, Q., Sklar, P., McCarthy, M. I., Brown, M. A., and  
586 Yang, J. (2017). “10 Years of GWAS Discovery: Biology, Function, and Translation.” *The*  
587 *American Journal of Human Genetics*, 101(1), 5–22.
- 588 Waddington, C. H. (2015). *Strategy of the Genes*. Taylor & Francis, Place of publication not  
589 identified OCLC: 960838218.
- 590 Wang, Y., Gjuvsland, A. B., Vik, J. O., Smith, N. P., Hunter, P. J., and Omholt, S. W.  
591 (2012). “Parameters in Dynamic Models of Complex Traits are Containers of Missing  
592 Heritability.” *PLoS Computational Biology*, 8(4), e1002459.
- 593 Wang, Z. and Zhang, J. (2009). “Why Is the Correlation between Gene Importance and Gene  
594 Evolutionary Rate So Weak?.” *PLoS Genetics*, 5(1), e1000329.
- 595 Wang, Z. and Zhang, J. (2011). “Impact of gene expression noise on organismal fitness and  
596 the efficacy of natural selection.” *Proceedings of the National Academy of Sciences*, 108(16).
- 597 Welch, S. M., Dong, Z., Roe, J. L., and Das, S. (2005). “Flowering time control: gene net-  
598 work modelling and the link to quantitative genetics.” *Australian Journal of Agricultural*  
599 *Research*, 56(9), 919.
- 600 Wray, N. R., Wijmenga, C., Sullivan, P. F., Yang, J., and Visscher, P. M. (2018). “Common

601 Disease Is More Complex Than Implied by the Core Gene Omnigenic Model.” *Cell*, 173(7),  
602 1573–1580.

603 Wray, N. R., Yang, J., Hayes, B. J., Price, A. L., Goddard, M. E., and Visscher, P. M.  
604 (2013). “Pitfalls of predicting complex traits from snps.” *Nature Reviews Genetics*, 14(7),  
605 507–515.

606 Yubero, P. (2022). “Data and code of The limitations of phenotype prediction in metabolism.

607 Zaidi, A. A. and Mathieson, I. (2020). “Demographic history mediates the effect of stratifi-  
608 cation on polygenic scores.” *eLife*, 9, e61548.



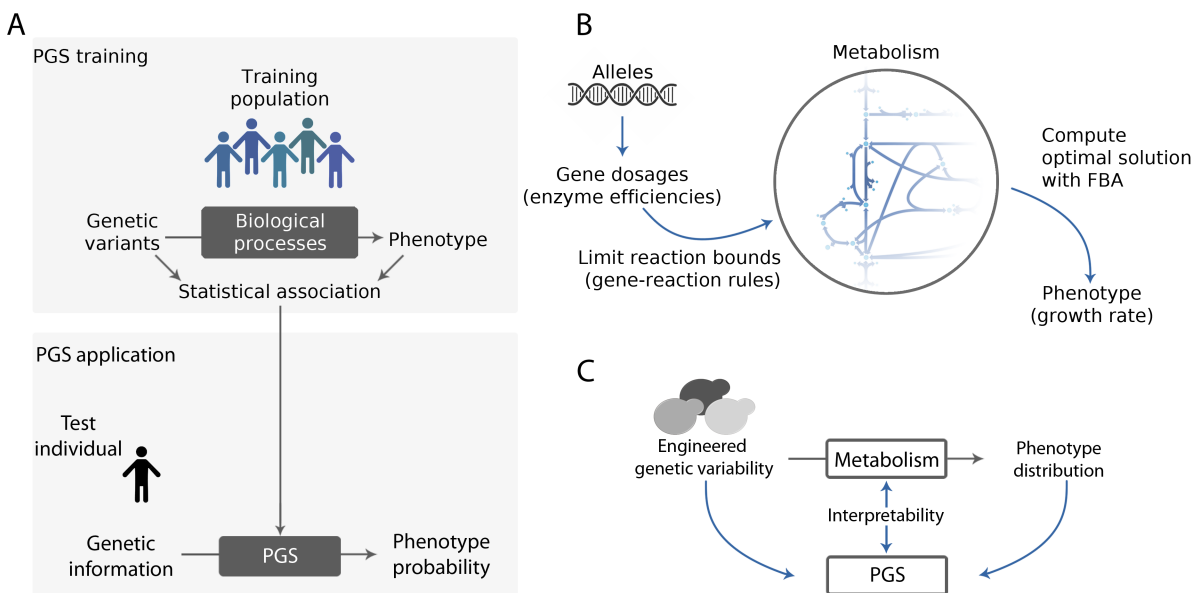

**Fig. 1. Metabolic reconstructions provide an explicit GP map that allows us to open the black box of phenotype prediction.** (A) Phenotype prediction is typically based on the statistical association of genetic and phenotype variants in a training population. This approach defines a black box that bypasses all underlying biological processes. With the genetic information of a test individual, the model calculates a *polygenic score* (PGS) with the probability of observing the specific trait. (B) We benefit from the metabolic reconstruction of *S. cerevisiae* to generate an *in silico* population of yeast metabolisms. Genetic variability is modeled by the effect of alleles on gene dosages, which limits the maximum flux through their reactions according to the gene-reaction rules. Given these constraints, flux balance analysis (FBA) computes the growth rate of each individual in the population. (C) We quantify the statistical associations to elaborate a PGS for growth rate. Together with the availability of the underlying model, this enables us to "open" the black box of phenotype prediction to investigate its limitations.

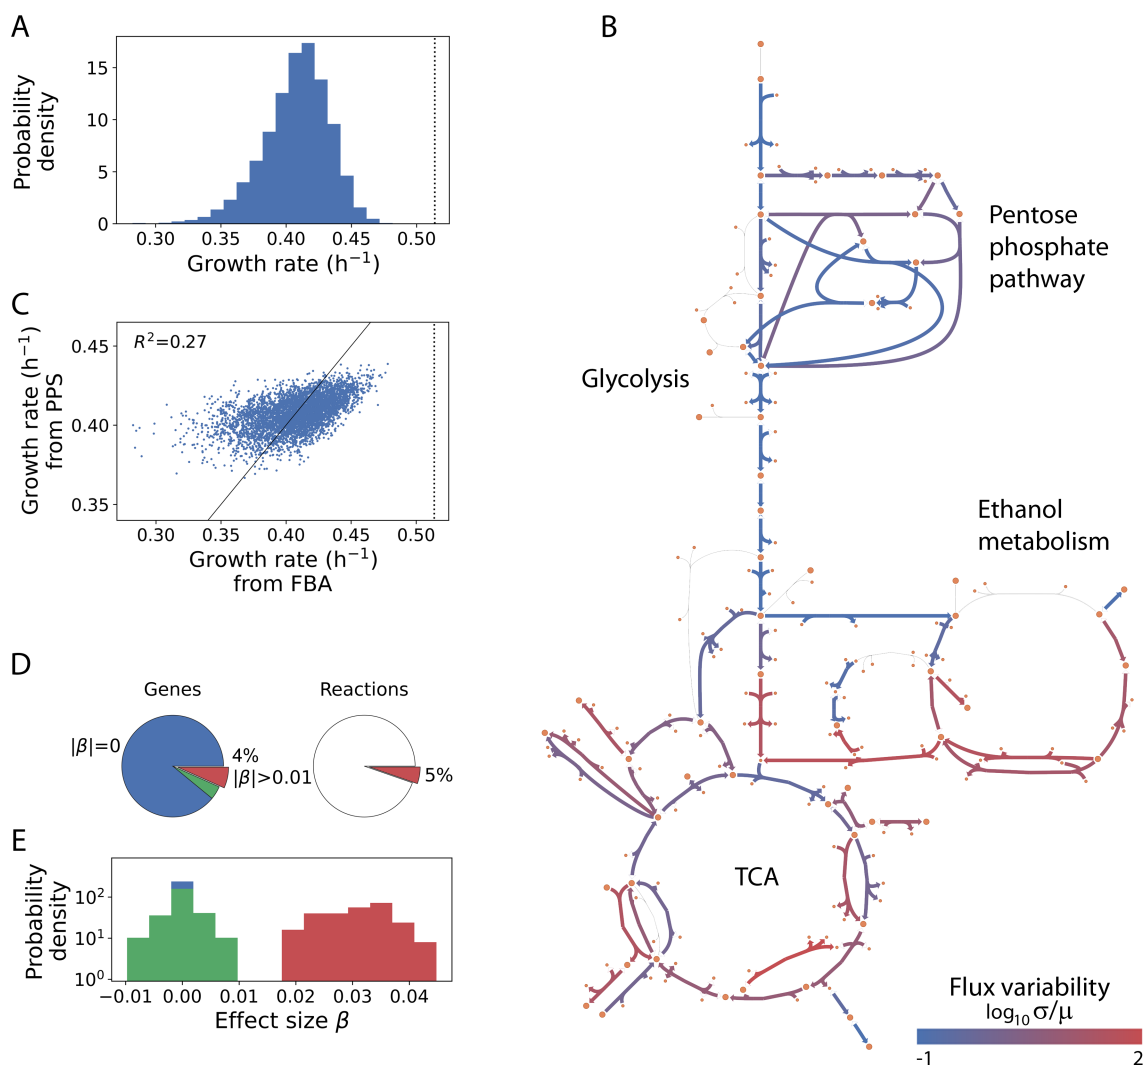

**Fig. 2. The PGS reveals that a small number of genes explains 27% of growth variability in yeast metabolism.** (A) We generate a synthetic population of  $5 \cdot 10^3$  yeast metabolisms with relative gene dosages sampled from a normal distribution (Methods). For each individual, we compute its growth rate with flux balance analysis. Such genetic variability induces a distribution of growth rates with mean and deviation  $\mu = 0.41 \pm 0.03$ . The vertical dotted line shows the wild-type growth rate ( $\mu_{wt} = 0.51$ ). (B) Central carbon metabolism cartoon emphasizing the variability in flux solutions across the population. (C) We trained a polygenic score (PGS) to anticipate growth rates from gene dosage data. The PGS explains 27% of the growth rate variability observed in the training population. (D,E) The PGS computes a specific effect size for each gene,  $\beta$ . Most of the genes, 88.7%, have null effect sizes (blue), while only 4.3% of the genes (red) are strongly associated with growth rate with  $|\beta| > 0.01$ . The latter control just 5% of the metabolic reactions.

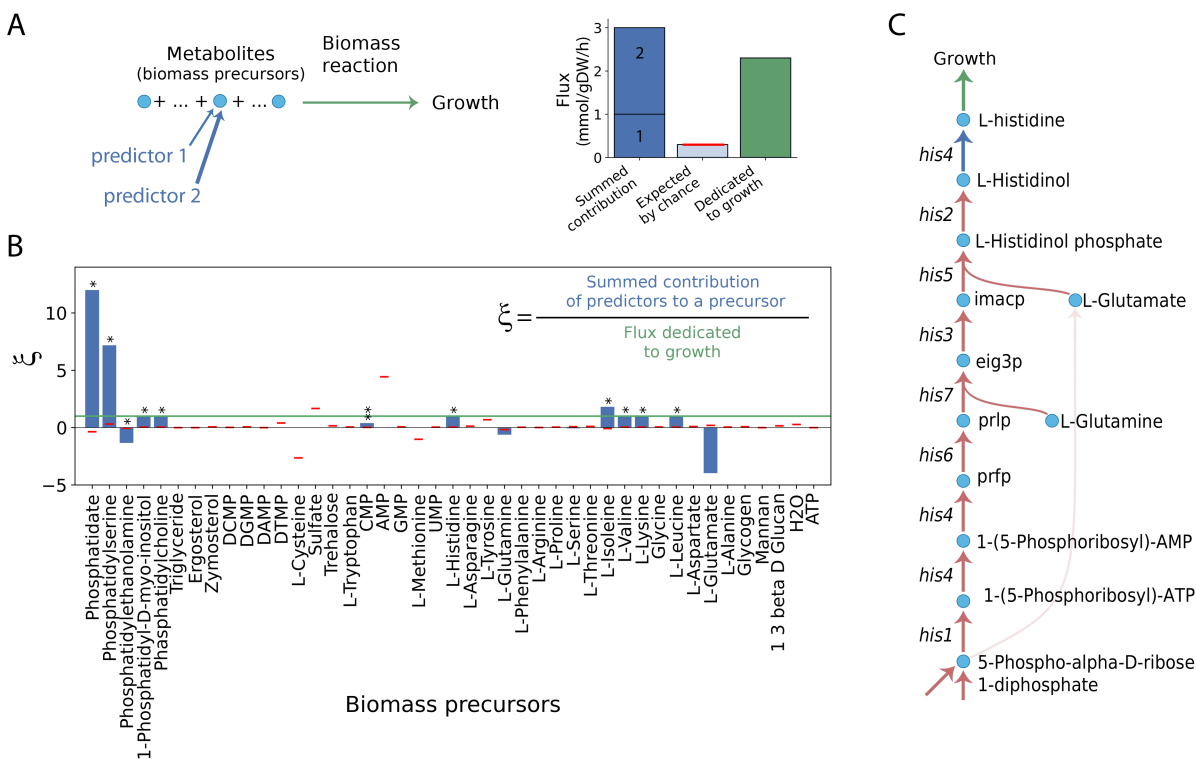

**Fig. 3. Top gene predictors control the production of a few metabolites required for growth.** (A) Biomass precursors in metabolic reconstructions are metabolites that ultimately fuel the biomass reaction, which simulates growth. We compute the contribution of several genes (e.g., predictors 1 and 2) to the production of a specific precursor and compare it with the expected contribution of randomly selected genes (red horizontal line), or with the flux devoted to growth (green). (B) Mean values of  $\xi$ , the aggregate contribution of the predictor genes to the production of each precursor relative to biomass consumption, across the population of yeast metabolisms. For example, we observe that the predictor genes produce 100% of the L-histidine consumed by growth (horizontal green line). We tested significant contributions after  $5 \times 10^3$  gene randomizations controlling for subset size (mean, red horizontal lines; \*  $p < 0.05$ , \*\*  $p < 0.01$ ). The case of L-glutamate is not significant due to a large variance (not shown for clarity). (C) Part of the metabolic pathway leading to L-histidine production. Although it is produced directly by *his4*, its production is influenced by upstream histidine-related genes, which also appear as important growth predictors.

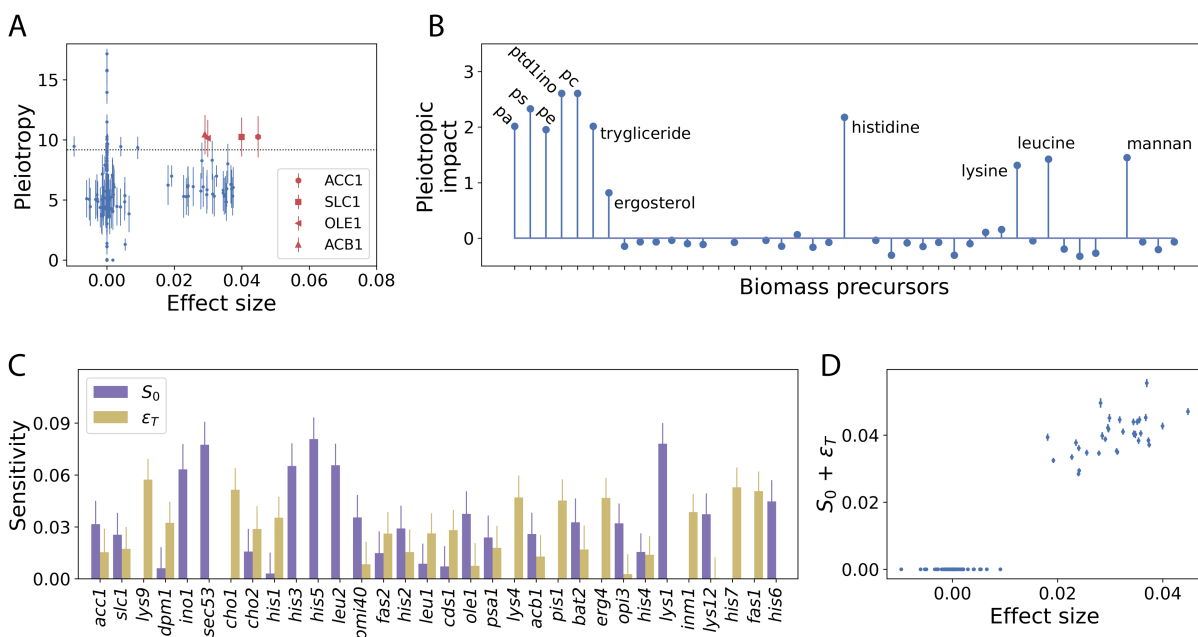

**Fig. 4. System-wide effects of top predictors.** (A) Pleiotropy of each gene after a 90% dosage reduction (Methods). Only a few top predictors have significant values of pleiotropy (over the 95th percentile, horizontal dotted line). Mean values (dots) and one standard deviation (error bars) across  $10^3$  individuals. (B) The pleiotropic impact of genes with large effect sizes focuses on a subset of biomass precursors. We show the Z-score of the sum of predictors (genes) that are pleiotropic w.r.t each metabolite against the mean and deviation found across all genes. We use abbreviations for phosphatidate (pa), phosphatidylcholine (pc), phosphatidylserine (ps), and phosphatidyl 1D myo inositol (ptd1ino). (C) Global sensitivity analysis allows us to quantify both the additive impact of genes on the growth rate,  $S_0$  (purple), and the total epistatic effects,  $\epsilon_T$  (yellow), which include all 2nd and higher-order gene-gene interactions. Bars and vertical lines represent mean values and a standard deviation, respectively, of  $> 10^6$  simulations (Methods). (D) The sum of the additive and epistatic effects correlates well with the effect sizes of the polygenic score (Pearson's  $\rho > 0.97$ ).

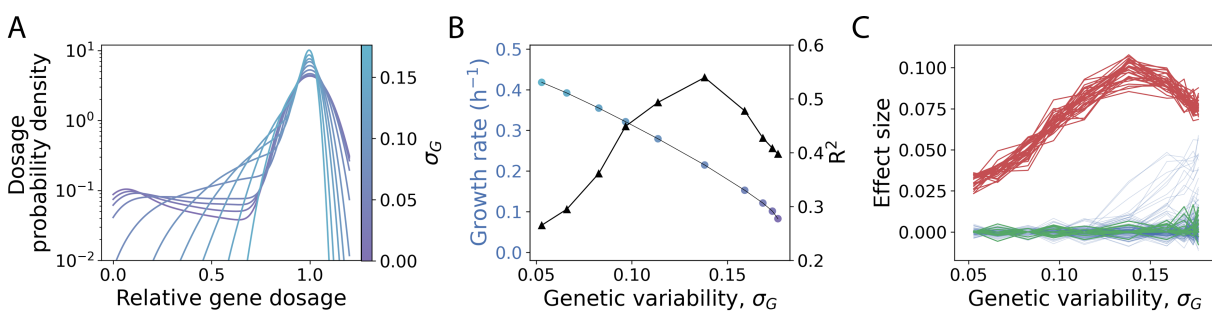

**Fig. 5. Populations with different genetic variability reveal a common PGS architecture but also its predictive limit.** (A) Probability density function estimate (kernel,  $\text{bw}=0.3$ ) of relative gene dosages of 10 populations with increasing genetic variability ( $\sigma_G$ ). (B) With FBA, we compute the growth rates (mean values on the left y-axis, colored circles as in panel A) and trained a separate PGS for every population (coefficient of determination  $R^2$  on the right y-axis, black triangles). (C) Effect sizes of all genes as a function of  $\sigma_G$ . Lines are colored as in Fig. 2E.

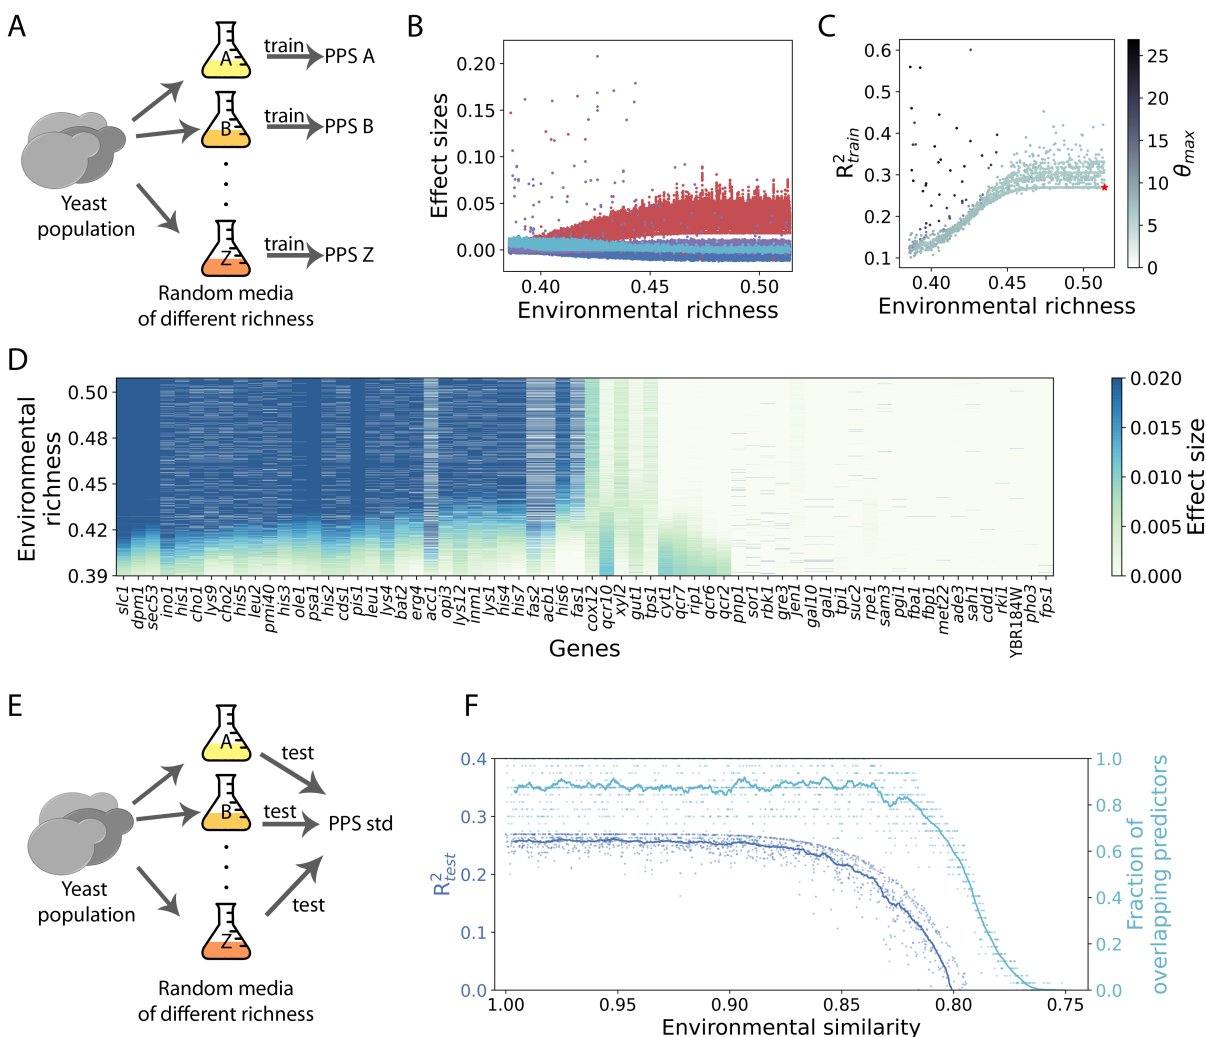

**Fig. 6. Environmental effects on phenotype predictability and the portability of a PGS.** (A) We compute the growth rates of a fixed population in  $10^3$  random environments with different richness (Methods) to train a PGS in each of these. (B) Effect sizes of all PGSs as a function of environmental richness. We highlight previously identified top predictors (red, as in Fig. 2), a novel set of predictors recurrent in poorer media that are related to the mitochondrial respiratory chain (cyan), and genes that show large effects in only specific media (purple). (C) The predictability of a PGS typically increases with environmental richness. However, in some media, predictability improves up to  $R^2 = 0.6$  due to strong gene-environment interactions identified by outliers in the effect sizes ( $\theta_{max}$  is the Z-score of the maximum effect size found in each PGS). (D) Effect sizes of genetic predictors follow a clear trend as a function of environmental richness. We show explicitly the values for all genes that have an effect size  $\beta > 0.01$  in any PGS. (E) Next, we test the "portability" of the PGS computed in the standard medium,  $PGS_{std}$ , that is, its ability to predict growth rates in different environments. (F) The portability of  $PGS_{std}$  (left y-axis) holds within a certain environmental similarity, measured as the ratio of the random and the standard medium richness. The fall in "portability" is linked to the decreased overlap of predictors between  $PGS_{std}$  and the corresponding PGS of the medium (right y-axis). The dots and lines correspond to individual media and a running average ( $n = 50$ ), respectively.
